## Obituary

It is our sad duty to inform you that our son Steven Karger passed away on March 5, 2008. Surrounded by his family, he died peacefully, exhausted after his long and intense battle against brain cancer.

Born in 1959 as our eldest son, he joined the family business in 1982. After his studies in marketing and economics, Steven chose to learn and hone the skills of his trade directly on the job, first as an intern with other publishers, then as my right hand, and later as managing director of the bookshop and agency Karger Libri as well as the German branch of our publishing business. As of July 1999, Steven held the position of CEO and was responsible for the day-to-day business of all Karger enterprises worldwide.

With his openness, warmth and abundance of energy, he led the company successfully into the new millennium and the electronic era, his leadership being characterized by respect, honesty, caring and a wonderful sense of humor. The values and principles guiding him throughout his life were securely anchored in his religious faith, tradition and heritage. His keen interest in people and the world around him led him to seek out innovations and at the same time maintain company values such as quality, independence and good customer service.

Steven Karger was a loving family man and leaves a wife and three children. He was a wonderful and reliable friend. He was involved in many cultural and social activities and projects in his city and community and was well known as someone who would generously contribute both his personal time and energy for a good cause. As an amateur flutist in the best sense of the word, he always

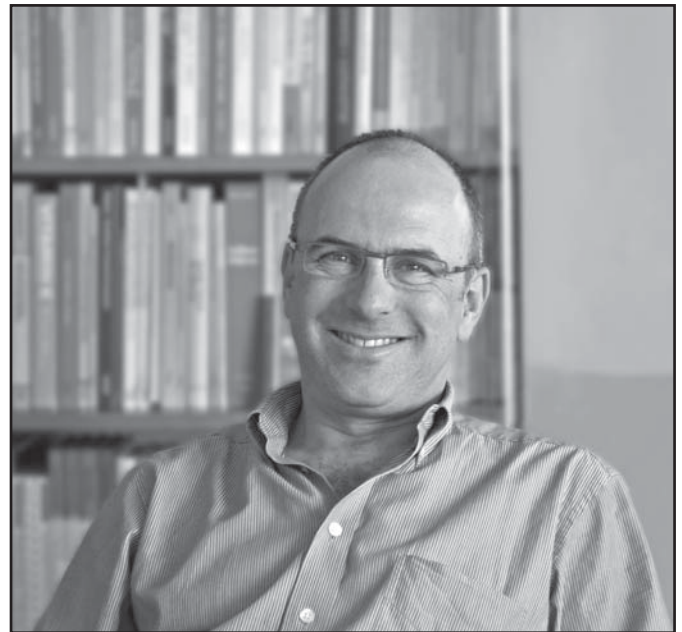

*Steven Karger (1959–2008)*

found classical music to be a source of strength, solace and inspiration.

He touched many lives and will be remembered not only for his astute business knowledge but mostly for his sincere, warm and caring nature.

Our youngest daughter Gabriella Karger will be taking over his business responsibilities.

*Thomas and Yvette Karger and family*
